# Supplementary material for: Land surface temperature trends derived from Landsat imagery in the Swiss Alps
Source: Copernicus journal article supplement (doi:10.5194/egusphere-2024-1228), 2024-05-17
Supplement: Supplementary file 2 [file Supplementary_material_README.docx]

Supplementary material

Land surface temperature trends derived from Landsat imagery in the Swiss Alps

Deniz Tobias Gök1, Dirk Scherler1,2, Hendrik Wulf3

1 GFZ German Research Centre for Geosciences; D-14473 Potsdam, Germany.

2 Institute of Geographical Sciences, Freie Universität Berlin; D-14195 Berlin, Germany.

3 Remote Sensing Laboratories, University of Zurich; CH-8057 Zurich, Switzerland.

*Corresponding author: d_goek@gfz-potsdam.de

1. Excel

*File: A_imis_landsat_trends_L578.xlsx*

Excel table contains Intercantonal Measurement and Information System (IMIS) Land Surface Temperature (LST) Trends, Landsat derived LST trends, IMIS Station Metadata and Validation metrics.

1. PDF

*File: B_landsat_timeseries_model_allstations.pdf*

PDF file contains figures of Landsat Land Surface Temperature (LST) time series and harmonic model at each IMIS station.

1. Word

*File: C_supplementary_material.docx*

Word file contains additional explanatory figures.
